# Supplementary material
Source: PubMed Central journal article supplement (PMC6039663)
Supplement: ba019034-suppl1.pdf [file ba019034-suppl1.pdf]

## SUPPLEMENTAL DATA

### **Exposure-adjusted adverse events comparing blinatumomab with chemotherapy in advanced acute lymphoblastic leukemia**

Anthony S. Stein,<sup>1</sup> Richard A. Larson,<sup>2</sup> Andre C. Schuh,<sup>3</sup> William Stevenson,<sup>4</sup> Ewa Lech-Maranda,<sup>5</sup> Qui Tran,<sup>6</sup> Zachary Zimmerman,<sup>6</sup> William Kormany,<sup>6</sup> and Max S. Topp<sup>7</sup>

<sup>1</sup>Gehr Family Center for Leukemia Research, City of Hope, Duarte, CA, USA; <sup>2</sup>University of Chicago, Chicago, IL, USA; <sup>3</sup>Princess Margaret Cancer Centre, Toronto, Canada; <sup>4</sup>University of Sydney, Sydney, Australia; <sup>5</sup>Institute of Hematology and Transfusion Medicine and Centre of Postgraduate Medical Education, Warsaw, Poland; <sup>6</sup>Amgen Inc, Thousand Oaks, CA, USA; <sup>7</sup>Universitätsklinikum Würzburg, Würzburg, Germany

## Standard-of-Care Chemotherapy (SOC) Regimens

Patients assigned to the SOC arm received one of four regimens based on investigator's choice (see below). Once a chemotherapy regimen was initiated, the regimen was not to be changed. If indicated for toxicity or other safety reasons, dose modifications were performed as specified by the protocol.<sup>1</sup> A change in regimen only occurred if the criteria for discontinuation were met.

1. FLAG (fludarabine, cytarabine arabinoside, and granulocyte colony-stimulating factor) ± anthracycline-based regimen (such as idarubicin 10 mg/m<sup>2</sup> on days 1 and 3; fludarabine 30 mg/m<sup>2</sup> on days 1–5; cytarabine arabinoside 2 g/m<sup>2</sup> on days 1–5). For patients > 60 years of age: idarubicin 5 mg/m<sup>2</sup> on days 1 and 3; fludarabine 20 mg/m<sup>2</sup> on days 1–5; cytarabine 1 g/m<sup>2</sup> on days 1–5.
2. HiDAC (high-dose cytarabine arabinoside)-based regimen utilizing doses of cytarabine arabinoside of at least 1 g/m<sup>2</sup> or greater per day ± anthracycline and/or in combination with other drugs, such as native *E. coli* asparaginase, polyethylene glycol-asparaginase (PEG-asparaginase), vinca alkaloids, steroids, etoposide, or alkylating agents.
3. High-dose methotrexate (HDMTX)-based regimen (such as 500 mg/m<sup>2</sup>–3 g/m<sup>2</sup> [infusion time up to 24 hours]) in combination with other drugs, such as native *E. coli* asparaginase, PEG-asparaginase, vinca alkaloids, steroids, etoposide, or alkylating agents.
4. Clofarabine or clofarabine-based regimens. Clofarabine use as a single agent should follow the recommended prescribing information. Clofarabine combination-based regimens should use ≥ 20 mg/m<sup>2</sup>/day for up to 5 days.

Additional details on dose modifications, interruptions, and discontinuations for both treatments can be found in the Supplementary Materials – Protocol.<sup>1</sup>

## REFERENCE

1. Kantarjian H, Stein A, Gokbuget N, et al. Blinatumomab versus Chemotherapy for Advanced Acute Lymphoblastic Leukemia. *N Engl J Med*. 2017;376(9):836-847.

**Table S1: All grade treatment-emergent AEs of clinical interest: incidence rates<sup>a</sup>**

|                            | <b>Blinatumomab<br/>(N = 267)<br/>No. of patients (%)</b> | <b>SOC<br/>(N = 109)<br/>No. of patients (%)</b> |
|----------------------------|-----------------------------------------------------------|--------------------------------------------------|
|                            | <b>Any grade</b>                                          | <b>Any grade</b>                                 |
| Any AE                     | 263 (99)                                                  | 108 (99)                                         |
| Cytokine release syndrome  | 43 (16)                                                   | 0                                                |
| Cytokine release syndrome  | 38 (14)                                                   | 0                                                |
| Hematophagic histiocytosis | 4 (1)                                                     | 0                                                |
| Cytokine storm             | 1 (< 1)                                                   | 0                                                |
| Tumor lysis syndrome       | 10 (4)                                                    | 1 (1)                                            |
| Acute pancreatitis         | 1 (< 1)                                                   | 1 (1)                                            |
| Neurologic events          | 163 (61)                                                  | 54 (50)                                          |
| Headache                   | 77 (29)                                                   | 32 (29)                                          |
| Insomnia                   | 28 (10)                                                   | 10 (9)                                           |
| Tremor                     | 26 (10)                                                   | 0                                                |
| Dizziness                  | 18 (7)                                                    | 8 (7)                                            |
| Somnolence                 | 14 (5)                                                    | 1 (1)                                            |
| Seizure                    | 5 (2)                                                     | 4 (4)                                            |
| Gastrointestinal disorders | 150 (56)                                                  | 87 (80)                                          |
| Diarrhea                   | 58 (22)                                                   | 38 (35)                                          |
| Nausea                     | 51 (19)                                                   | 46 (42)                                          |
| Constipation               | 34 (13)                                                   | 28 (26)                                          |
| Vomiting                   | 33 (12)                                                   | 26 (24)                                          |
| Stomatitis                 | 18 (7)                                                    | 14 (13)                                          |
| Abdominal pain             | 17 (6)                                                    | 19 (17)                                          |
| Dyspepsia                  | 10 (4)                                                    | 7 (6)                                            |
| Infections                 | 171 (64)                                                  | 79 (72)                                          |
| Cytopenias                 | 160 (60)                                                  | 79 (72)                                          |

|                                            |          |         |
|--------------------------------------------|----------|---------|
| Febrile neutropenia                        | 64 (24)  | 43 (39) |
| Neutropenia                                | 53 (20)  | 33 (30) |
| Thrombocytopenia                           | 47 (18)  | 32 (29) |
| Decreased platelets                        | 17 (6)   | 13 (12) |
| Decreased white blood cells                | 14 (5)   | 6 (6)   |
| Decreased neutrophils                      | 10 (4)   | 11 (10) |
| Leukopenia                                 | 10 (4)   | 5 (5)   |
| Decreased lymphocytes                      | 3 (1)    | 4 (4)   |
| Lymphopenia                                | 2 (1)    | 0       |
| Elevated liver enzymes                     | 58 (22)  | 27 (25) |
| Progressive multifocal leucoencephalopathy | 2 (1)    | 0       |
| Decreased immunoglobulins                  | 26 (10)  | 2 (2)   |
| Other AEs of interest                      |          |         |
| Pyrexia                                    | 159 (60) | 49 (45) |
| Anemia                                     | 69 (26)  | 46 (42) |

<sup>a</sup>Data are summarized for all patients who received at least one dose of study treatment. AE, adverse event; SOC, standard-of-care chemotherapy.

**Table S2: All grade treatment-emergent AEs of clinical interest: relative incidence rates in cycles 1 and cycle 2**

|                                   | Blinatumomab<br>(N = 267) |                      | SOC<br>(N = 109)     |                     |
|-----------------------------------|---------------------------|----------------------|----------------------|---------------------|
|                                   | Cycle 1<br>(n = 267)      | Cycle 2<br>(n = 151) | Cycle 1<br>(n = 109) | Cycle 2<br>(n = 28) |
| <b>Any AE, n (%)</b>              | <b>260 (97)</b>           | <b>122 (81)</b>      | <b>107 (98)</b>      | <b>28 (100)</b>     |
| Cytokine release syndrome         | 40 (15)                   | 5 (3)                | 0                    | 0                   |
| <b>Cytokine release syndrome</b>  | <b>36 (13)</b>            | <b>5 (3)</b>         | <b>0</b>             | <b>0</b>            |
| Hematophagic histiocytosis        | 3 (1)                     | 0                    | 0                    | 0                   |
| Cytokine storm                    | 1 (< 1)                   | 0                    | 0                    | 0                   |
| <b>Tumor lysis syndrome</b>       | <b>9 (3)</b>              | <b>0</b>             | <b>1 (1)</b>         | <b>0</b>            |
| Acute pancreatitis                | 1 (< 1)                   | 0                    | 0                    | 1 (4)               |
| <b>Neurologic events</b>          | <b>140 (52)</b>           | <b>45 (30)</b>       | <b>52 (48)</b>       | <b>6 (21)</b>       |
| Headache                          | 61 (23)                   | 13 (9)               | 30 (28)              | 3 (11)              |
| Insomnia                          | 21 (8)                    | 5 (3)                | 10 (9)               | 1 (4)               |
| Tremor                            | 24 (9)                    | 4 (3)                | 0                    | 0                   |
| Dizziness                         | 14 (5)                    | 2 (1)                | 7 (6)                | 1 (4)               |
| Somnolence                        | 12 (4)                    | 2 (1)                | 1 (1)                | 0                   |
| Seizure                           | 5 (2)                     | 0                    | 4 (4)                | 0                   |
| <b>Gastrointestinal disorders</b> | <b>132 (49)</b>           | <b>38 (25)</b>       | <b>82 (75)</b>       | <b>20 (71)</b>      |
| Diarrhea                          | 39 (15)                   | 16 (11)              | 35 (32)              | 4 (14)              |
| Nausea                            | 39 (15)                   | 13 (9)               | 40 (37)              | 13 (46)             |
| Constipation                      | 32 (12)                   | 3 (2)                | 24 (22)              | 8 (29)              |
| Vomiting                          | 14 (5)                    | 10 (7)               | 23 (21)              | 8 (29)              |
| Stomatitis                        | 10 (4)                    | 6 (4)                | 11 (10)              | 2 (7)               |
| Abdominal pain                    | 11 (4)                    | 3 (2)                | 17 (16)              | 2 (7)               |
| Dyspepsia                         | 6 (2)                     | 3 (2)                | 6 (6)                | 1 (4)               |
| <b>Infections</b>                 | <b>129 (48)</b>           | <b>43 (28)</b>       | <b>71 (65)</b>       | <b>14 (50)</b>      |
| Cytopenias                        | 134 (50)                  | 32 (21)              | 78 (72)              | 20 (71)             |

|                                            |          |         |         |         |
|--------------------------------------------|----------|---------|---------|---------|
| Febrile neutropenia                        | 58 (22)  | 6 (4)   | 40 (37) | 10 (36) |
| Neutropenia                                | 33 (12)  | 16 (11) | 32 (29) | 8 (29)  |
| Thrombocytopenia                           | 43 (16)  | 5 (3)   | 31 (28) | 9 (32)  |
| Decreased platelets                        | 14 (5)   | 3 (2)   | 11 (10) | 3 (11)  |
| Decreased white blood cells                | 11 (4)   | 3 (2)   | 5 (5)   | 2 (7)   |
| Decreased neutrophils                      | 7 (3)    | 1 (1)   | 9 (8)   | 5 (18)  |
| Leukopenia                                 | 10 (4)   | 2 (1)   | 4 (4)   | 1 (4)   |
| Decreased lymphocytes                      | 2 (1)    | 0       | 4 (4)   | 0       |
| Lymphopenia                                | 1 (< 1)  | 0       | 0       | 0       |
| Elevated liver enzymes                     | 55 (21)  | 10 (7)  | 26 (24) | 4 (14)  |
| Progressive multifocal leukoencephalopathy | 1 (< 1)  | 0       | 0       | 0       |
| Decreased immunoglobulins                  | 7 (3)    | 7 (5)   | 2 (2)   | 0       |
| Other AEs of interest                      |          |         |         |         |
| Pyrexia                                    | 147 (55) | 37 (25) | 43 (39) | 11 (39) |
| Anemia                                     | 66 (25)  | 5 (3)   | 45 (41) | 9 (32)  |

AE, adverse event; SOC, standard-of-care chemotherapy.

**Table S3: Exposure-adjusted event rates for treatment-emergent AEs of clinical interest**

|                                 | <b>Blinatumomab<br/>(N = 267)</b> |                                                 | <b>SOC chemotherapy<br/>(N = 109)</b> |                                                 |                            |
|---------------------------------|-----------------------------------|-------------------------------------------------|---------------------------------------|-------------------------------------------------|----------------------------|
| <b>Total treatment exposure</b> | <b>89.0 years</b>                 |                                                 | <b>14.8 years</b>                     |                                                 |                            |
|                                 | <b>No. of events</b>              | <b>Exposure-adjusted event rate<sup>b</sup></b> | <b>No. of events</b>                  | <b>Exposure-adjusted event rate<sup>b</sup></b> | <b>P-value<sup>a</sup></b> |
| All AEs                         | 4108                              | 46.16                                           | 2037                                  | 137.64                                          | <0.001                     |
| Cytokine release syndrome       | 56                                | 0.63                                            | 0                                     | 0                                               | <0.001                     |
| Cytokine release syndrome       | 49                                | 0.55                                            | 0                                     | 0                                               | 0.001                      |
| Hematophagic histiocytosis      | 6                                 | 0.07                                            | 0                                     | 0                                               | 0.174                      |
| Cytokine storm                  | 1                                 | 0.01                                            | 0                                     | 0                                               | —                          |
| Tumor lysis syndrome            | 10                                | 0.11                                            | 1                                     | 0.07                                            | 0.603                      |
| Acute pancreatitis              | 1                                 | 0.01                                            | 1                                     | 0.07                                            | 0.232                      |
| Neurologic events               | 420                               | 4.72                                            | 110                                   | 7.43                                            | <0.001                     |
| Headache                        | 101                               | 1.14                                            | 39                                    | 2.64                                            | <0.001                     |
| Insomnia                        | 38                                | 0.43                                            | 12                                    | 0.81                                            | 0.068                      |
| Tremor                          | 36                                | 0.40                                            | 0                                     | 0                                               | 0.001                      |
| Dizziness                       | 20                                | 0.23                                            | 8                                     | 0.54                                            | 0.051                      |
| Somnolence                      | 19                                | 0.21                                            | 1                                     | 0.07                                            | 0.180                      |
| Seizure                         | 5                                 | 0.06                                            | 4                                     | 0.27                                            | 0.029                      |
| Gastrointestinal disorders      | 402                               | 4.52                                            | 339                                   | 22.91                                           | <0.001                     |
| Diarrhea                        | 72                                | 0.81                                            | 49                                    | 3.31                                            | <0.001                     |
| Nausea                          | 71                                | 0.80                                            | 69                                    | 4.66                                            | <0.001                     |
| Constipation                    | 45                                | 0.51                                            | 34                                    | 2.30                                            | <0.001                     |
| Vomiting                        | 35                                | 0.39                                            | 40                                    | 2.70                                            | <0.001                     |
| Stomatitis                      | 19                                | 0.21                                            | 16                                    | 1.08                                            | <0.001                     |
| Abdominal pain                  | 19                                | 0.21                                            | 25                                    | 1.69                                            | <0.001                     |
| Dyspepsia                       | 11                                | 0.12                                            | 7                                     | 0.47                                            | 0.010                      |



|                                            |     |      |     |       |        |
|--------------------------------------------|-----|------|-----|-------|--------|
| Infections                                 | 388 | 4.36 | 180 | 12.16 | <0.001 |
| Cytopenias                                 | 467 | 5.25 | 355 | 23.99 | <0.001 |
| Febrile neutropenia                        | 83  | 0.93 | 54  | 3.65  | <0.001 |
| Neutropenia                                | 108 | 1.21 | 52  | 3.51  | <0.001 |
| Thrombocytopenia                           | 112 | 1.26 | 111 | 7.50  | <0.001 |
| Decreased platelets                        | 54  | 0.61 | 73  | 4.93  | <0.001 |
| Decreased white blood cells                | 36  | 0.40 | 12  | 0.81  | 0.050  |
| Leukopenia                                 | 30  | 0.34 | 5   | 0.34  | 0.996  |
| Decreased neutrophils                      | 23  | 0.26 | 28  | 1.89  | <0.001 |
| Decreased lymphocytes                      | 3   | 0.03 | 8   | 0.54  | <0.001 |
| Lymphopenia                                | 3   | 0.03 | 0   | 0     | —      |
| Elevated liver enzymes                     | 176 | 1.98 | 102 | 6.89  | <0.001 |
| Progressive multifocal leukoencephalopathy | 4   | 0.04 | 0   | 0     | —      |
| Decreased immunoglobulins                  | 31  | 0.35 | 2   | 0.14  | 0.135  |
| Other AEs                                  |     |      |     |       |        |
| Pyrexia                                    | 335 | 3.76 | 75  | 5.07  | 0.024  |
| Anemia                                     | 204 | 2.29 | 146 | 9.87  | <0.001 |

<sup>a</sup>P-value comparing blinatumomab vs SOC from a Poisson regression model using number of AEs as the dependent variable and log(exposure time) as offset.

<sup>b</sup>Per patient-year.

Blue favors blinatumomab arm; red favors SOC.

AE, adverse event; No., number; SOC, standard-of-care chemotherapy.
